# Supplementary material for: Atmospheric pressure synthesis of nano-scale SAPO-34 catalysts for effective conversion of methanol to light olefins
Source: Royal Society of Chemistry journal article supplement (doi:10.1039/c9se00517j), 2019-01-01
Supplement: c9se00517j1.pdf [file c9se00517j1.pdf]

## Supporting Information

### Atmospheric pressure synthesis of nano-scaled SAPO-34 catalysts for effective conversion of methanol to light olefins

Meng Lyu,<sup>a,b</sup> Chengguang Yang,<sup>\*b</sup> Ziyu Liu,<sup>b</sup> Ting Wang,<sup>b</sup> Hongjiang Liu,<sup>a</sup> Xinqing Chen,<sup>\*b,d</sup> and Yuhan Sun<sup>b,c,d</sup>

<sup>a</sup>Department of Chemistry, School of Science, Shanghai University, Shanghai 200444, PR China

<sup>b</sup>CAS Key Laboratory of Low-Carbon Conversion Science and Engineering, Shanghai Advanced Research Institute, Chinese Academy of Sciences, Shanghai 201210, PR China.

<sup>c</sup>School of Physical Science and Technology, ShanghaiTech University, Shanghai 201210, PR China.

<sup>d</sup>University of Chinese Academy of Science, Beijing, 100049, China

### **Synthesis of $\text{Al}_2\text{MgO}_8\text{Si}_2$**

$\text{Al}_2\text{MgO}_8\text{Si}_2$  was pre-synthesized by the following method.  $\text{Al}_2(\text{SO}_4)_3 \cdot 18\text{H}_2\text{O}$  was dispersed in stirring to the solution of  $\text{Na}_2\text{SiO}_3$  under  $85^\circ\text{C}$ . After cooling down to room temperature,  $\text{MgO}$ ,  $\text{NaAlO}_2$  and  $\text{NaOH}$  solution were added into the above solution in turn. The mixture was filtered after 1 hour of the reaction, washed three times with deionized water to remove sodium ions and dried overnight to obtain  $\text{Al}_2\text{MgO}_8\text{Si}_2$ .

### **Synthesis of SAPO-34 zeolite without MgO**

SAPO-34 zeolite without  $\text{MgO}$  was prepared also under atmospheric pressure. A certain amount of silica resource and aluminum resource was added to TEAOH solution and stirred at room temperature for 2 h. Subsequently, the desired amount of  $\text{H}_3\text{PO}_4$ , SAPO-34 seeds and deionized water were added in turn and stirred for 6 h. The synthesis gel with a molar composition of  $1.0 \text{ Al}_2\text{O}_3 : 0.5 \text{ SiO}_2 : 1.0 \text{ P}_2\text{O}_5 : 1.0 \text{ TEAOH} : 50 \text{ H}_2\text{O}$  was heated to  $90^\circ\text{C}$  and kept for 12 h to remove the solvent before it was crushed and sifed to 20-40 mesh. The obtained particles were transferred into a quartz tube and crystallized at  $200^\circ\text{C}$  for 24 h in presence of steam under atmospheric pressure. After calcination at  $600^\circ\text{C}$  for 5 h, the aimed sample was obtained.

### **Synthesis of SAPO-34 zeolite with MgO**

For comparasion, SAPO-34 zeolite with  $\text{MgO}$  was prepared also under atmospheric pressure. A certain amount of silica resource, aluminum resource and  $\text{MgO}$  was added to TEAOH solution and stirred at room temperature for 2 h. Then desired amount of  $\text{H}_3\text{PO}_4$ , SAPO-34 seeds and deionized water were added in turn and stirred for 6 h. The synthesis gel with a molar composition of  $1.0 \text{ Al}_2\text{O}_3 : 0.5 \text{ SiO}_2 : 1.0 \text{ P}_2\text{O}_5 : 1.0 \text{ TEAOH} : 50 \text{ H}_2\text{O}$  was heated to  $90^\circ\text{C}$  and kept for 12 h to remove the solvent before it was crushed and sifed to 20-40 mesh. The obtained particles were transferred into a quartz tube and crystallized at  $200^\circ\text{C}$  for 24 h in presence of steam under atmospheric pressure. After calcination at  $600^\circ\text{C}$  for 5 h, SAPO-34 containing  $\text{MgO}$  was obtained.

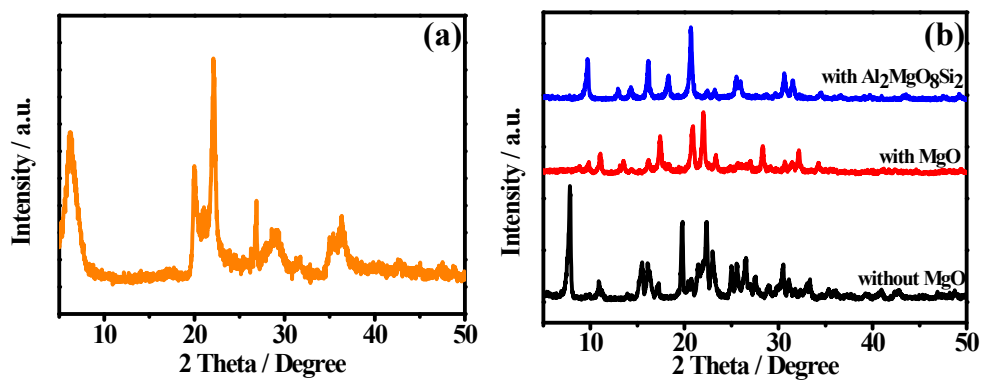

Fig. S1 XRD patterns of  $\text{Al}_2\text{MgO}_8\text{Si}_2$  (a), and SAPO-34 synthesized without MgO, with MgO and with  $\text{Al}_2\text{MgO}_8\text{Si}_2$  (b).

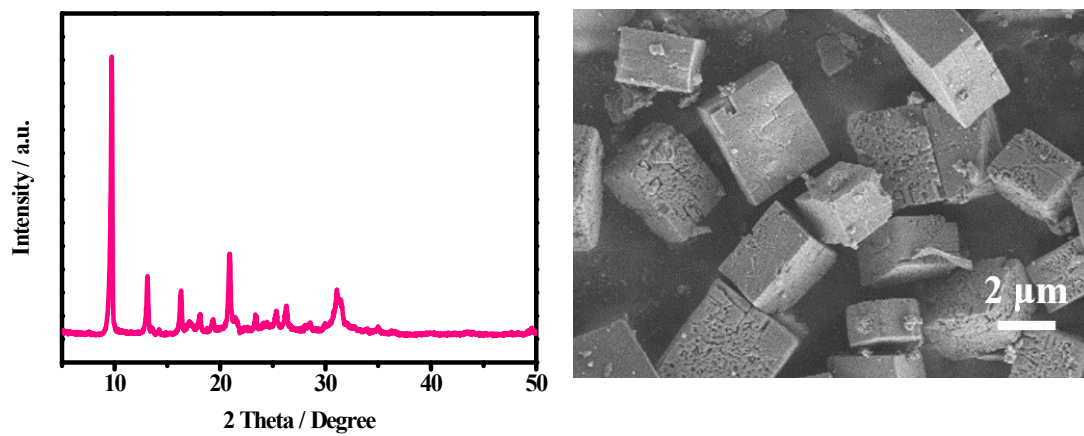

Fig. S2 XRD pattern and SEM image of SP34-CS.

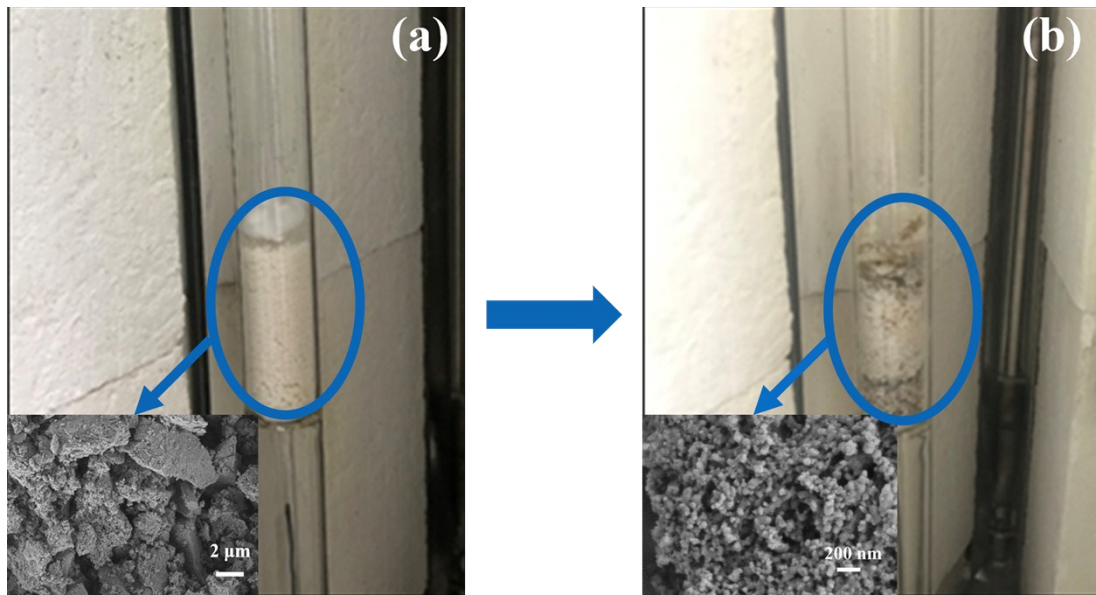

Fig. S3 Photographs and SEM images of dried gels before (a) and after (b) crystallization.

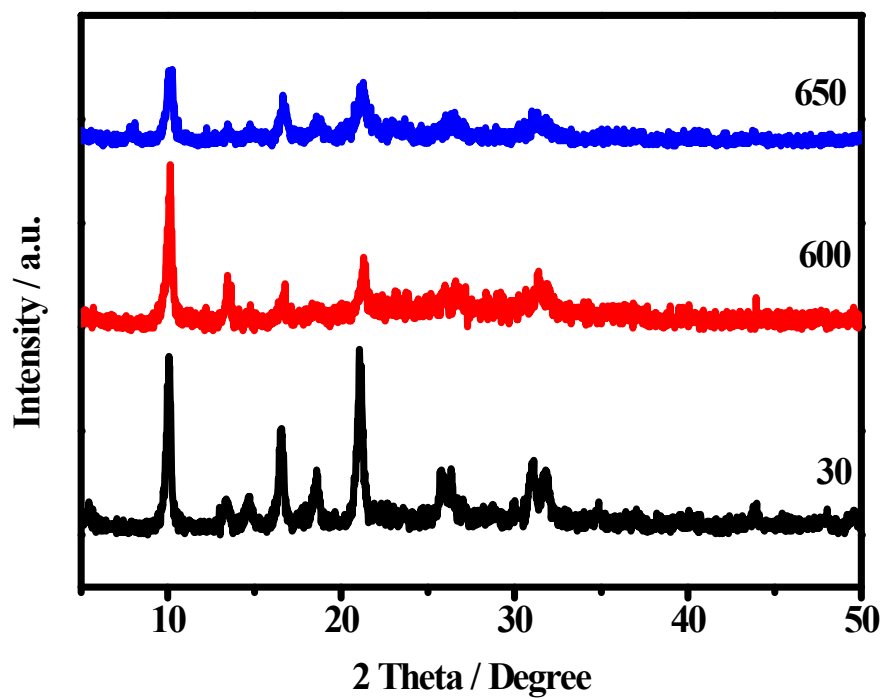

Fig. S4 XRD pattern of SP34-AS-3 before and after hydrothermally treated at 600 and 650 °C for 2 h .

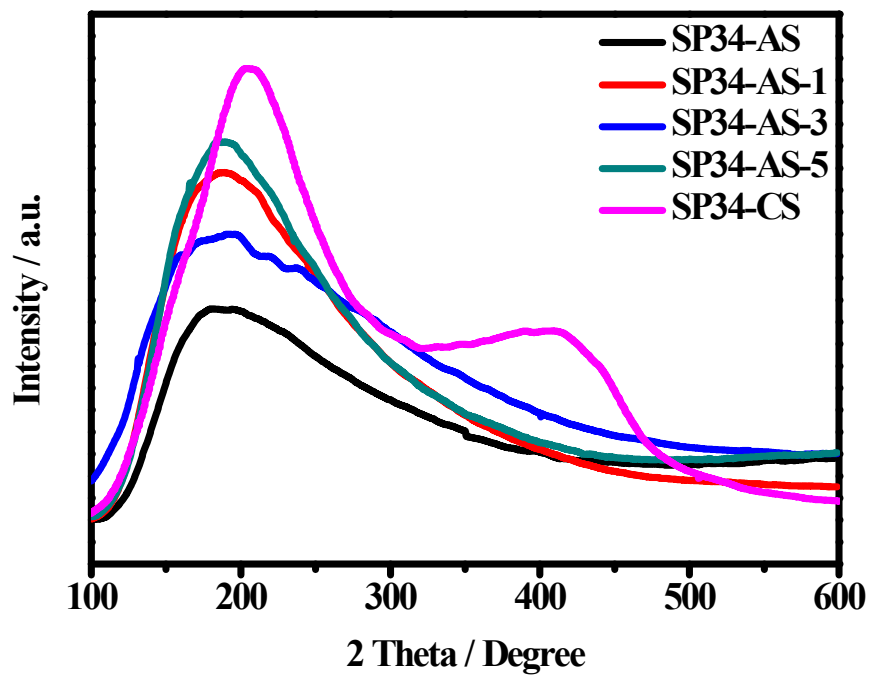

Fig. S5 NH<sub>3</sub>-TPD profiles of SP34-AS, SP34-AS-1, SP34-AS-3, SP34-AS-5 and SP34-CS.

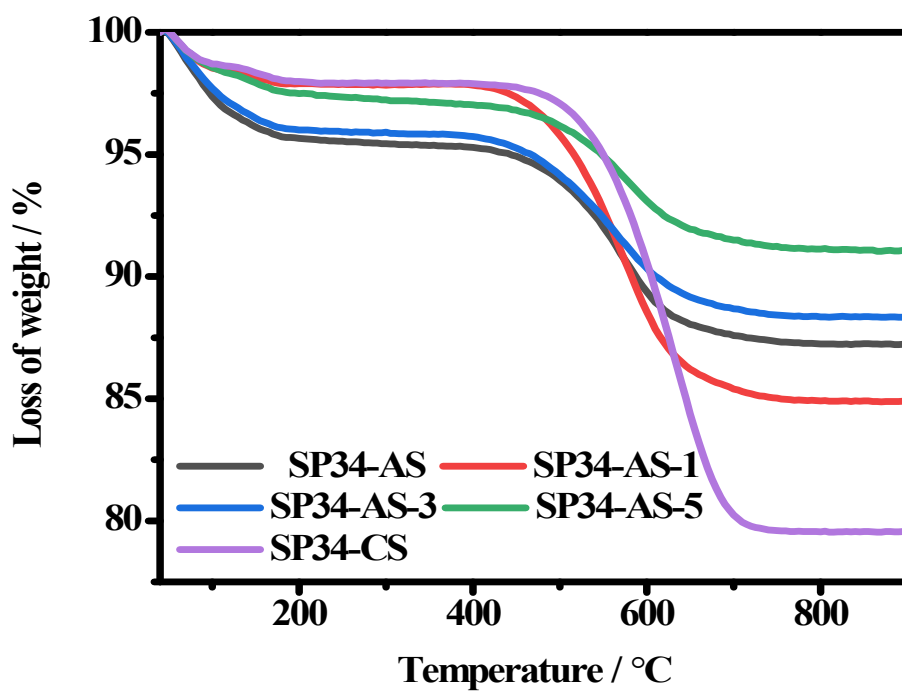

Fig. S6 TG curves of SP34-AS, SP34-AS-1, SP34-AS-3, SP34-AS-5 and SP34-CS.



Table S1 The acid site density of prepared samples

| Sample                        | SP34-AS | SP34-AS-1 | SP34-AS-3 | SP34-AS-5 | SP34-CS |
|-------------------------------|---------|-----------|-----------|-----------|---------|
| Acid site density<br>(mmol/g) | 0.23    | 0.33      | 0.28      | 0.34      | 0.43    |

Table S2 Product selectivity (%) of MTO reaction over various catalysts.

| Catalysts | Lifetime /min <sup>a</sup> | C <sub>1</sub> | C <sub>2</sub> <sup>=</sup> | C <sub>2</sub> | C <sub>3</sub> <sup>=</sup> | C <sub>3</sub> | C <sub>4</sub> | C <sub>4</sub> <sup>=</sup> | C <sub>2</sub> <sup>=</sup> +C <sub>3</sub> <sup>=</sup> | C <sub>2</sub> <sup>=</sup> ~C <sub>4</sub> <sup>=</sup> | Carbon balance |
|-----------|----------------------------|----------------|-----------------------------|----------------|-----------------------------|----------------|----------------|-----------------------------|----------------------------------------------------------|----------------------------------------------------------|----------------|
| SP34-CS   | 450                        | 1.64           | 23.51                       | 1.73           | 34.31                       | 14.05          | 4.48           | 13.55                       | 57.82                                                    | 71.37                                                    | 98%            |
| SP34-AS   | 120                        | 1.44           | 28.61                       | 0.35           | 39.80                       | 4.67           | 4.45           | 14.50                       | 68.41                                                    | 82.91                                                    | 95%            |
| SP34-AS-1 | 240                        | 1.34           | 27.24                       | 0.73           | 40.71                       | 4.34           | 4.75           | 14.56                       | 67.95                                                    | 82.51                                                    | 97%            |
| SP34-AS-3 | 330                        | 1.58           | 31.03                       | 0.56           | 39.61                       | 4.13           | 4.33           | 12.96                       | 70.64                                                    | 83.60                                                    | 98%            |
| SP34-AS-5 | 60                         | 1.01           | 27.07                       | 0.39           | 40.09                       | 3.94           | 5.10           | 15.97                       | 67.16                                                    | 83.13                                                    | 94%            |

Reaction conditions : WHSV = 0.5 h<sup>-1</sup>, T = 400°C, catalyst weight = 1.0 g and 1 atm.

<sup>a</sup> Catalyst lifetime is defined as the reaction duration with methanol conversion higher than 95%.

Table S3 Variation of coke formation in methanol conversion over SAPO-34.

| Samples                     | SP34-AS | SP34-AS-1 | SP34-AS-3 | SP34-AS-5 | SP34-CS |
|-----------------------------|---------|-----------|-----------|-----------|---------|
| coke (% g/gcat)             | 8.05    | 12.93     | 7.38      | 5.91      | 18.34   |
| TOS (min)                   | 120     | 240       | 330       | 60        | 450     |
| R <sub>coke</sub> (mg/min)  | 0.67    | 0.54      | 0.22      | 0.99      | 0.41    |
| P <sub>coke</sub> (g/gMeOH) | 0.08    | 0.06      | 0.03      | 0.12      | 0.05    |

$R_{\text{coke}} \text{ (mg/min)} = \text{Coke amount (mg)} / \text{reaction time (min)}$ ,

$P_{\text{coke}} \text{ (g/g)} = \text{Coke amount (g)} / \text{methanol feedstock (g)}$ .
